# Supplementary material for: IL7 genetic variation and toxicity to immune checkpoint blockade in patients with melanoma
Source: PubMed Central journal article supplement (PMC9800275; doi:10.1038/s41591-022-02095-5), 2022-12-16
Supplement: 41591_2022_2095_MOESM1_ESM.pdf [file 41591_2022_2095_MOESM1_ESM.pdf]

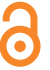

---

# **IL7 genetic variation and toxicity to immune checkpoint blockade in patients with melanoma**

---

In the format provided by the authors and unedited

---

# Supplementary Figure 1

a.

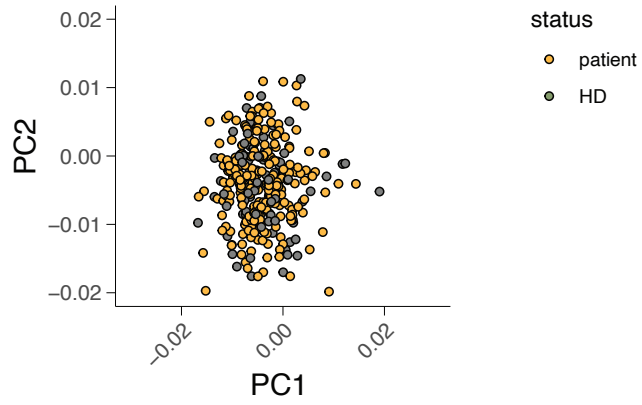

b.

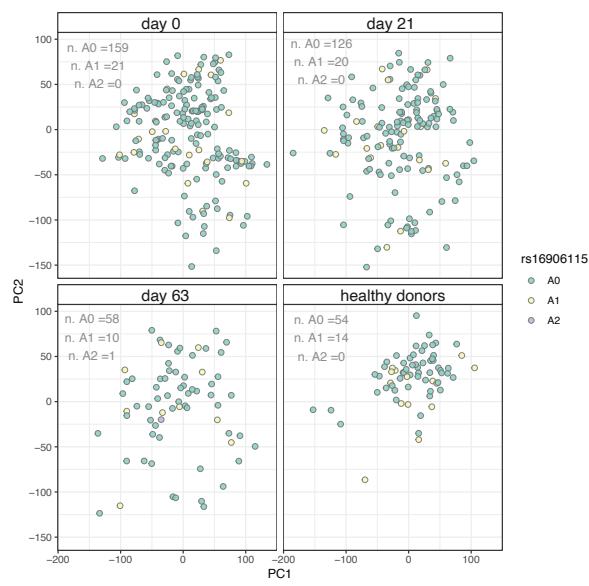

c.

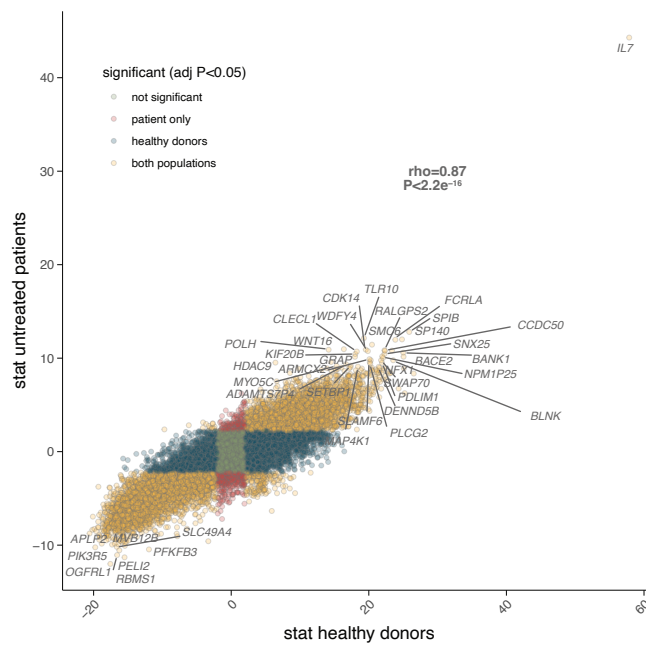

## Supplementary Figure 2

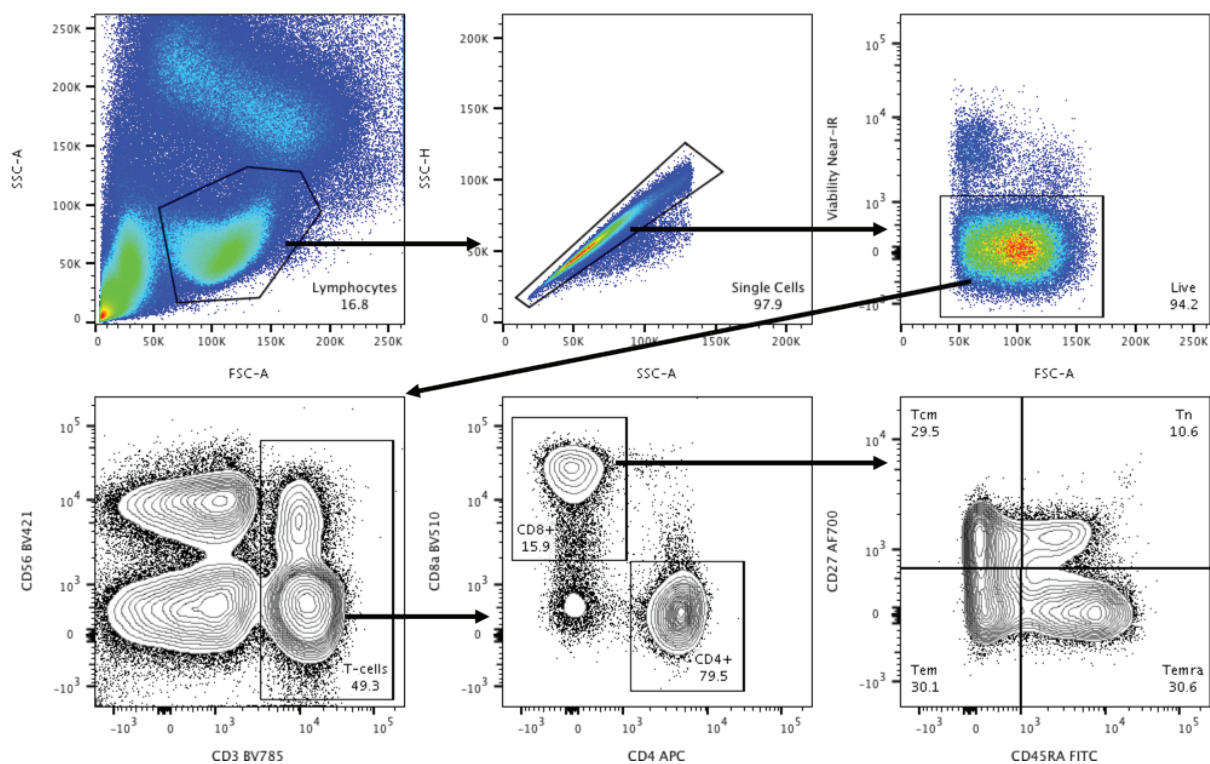

Gating strategy to identify CD8+ T-cell subsets from whole PBMCs

| Antibody                                       | Clone  | Conjugate | Supplier                |
|------------------------------------------------|--------|-----------|-------------------------|
| LIVE/DEAD™ Fixable Near-IR Dead Cell Stain Kit | n/a    | n/a       | Thermofisher scientific |
| Mouse anti-human CD3                           | UCHT1  | FITC      | Biolegend               |
| Mouse anti-human CD56                          | HCD56  | FITC      | Biolegend               |
| Mouse anti-human CD4                           | RPA-T4 | APC       | Biolegend               |
| Mouse anti-human CD8a                          | RPA-T8 | BV510     | Biolegend               |
| Mouse anti-human CD45RA                        | HI100  | FITC      | Becton Dickinson        |
| Mouse anti-human CD27                          | M-T271 | AF700     | Biolegend               |
| Mouse anti-human CD19                          | SJ25C1 | BUV395    | Becton Dickinson        |
| Mouse anti-human IgD                           | IA6-2  | BV421     | Biolegend               |
| Mouse anti-human CD16                          | 3G8    | FITC      | Biolegend               |
